# Supplementary material for: Semantic Focusing Allows Fully Automated Single-Layer Slide Scanning of Cervical Cytology Slides
Source: PubMed Central journal article supplement (PMC3621829; doi:10.1371/journal.pone.0061441), 2013-04-09
Supplement: pone.0061441.s004.pdf [file pone.0061441.s004.pdf]

**Table S1. HSV color ranges used to identify object pixel in focus point images.**

| <b>Class</b>       | <b>Hue</b> | <b>Saturation</b> | <b>Value</b> |
|--------------------|------------|-------------------|--------------|
| Nuclei             | 100 - 145  | 60 - 80           | 10 - 220     |
| Cytoplasm          | 100 - 145  | 0 - 40            | 160 - 240    |
| p16 (DAB staining) | 5 - 35     | 10 - 180          | 20 - 145     |
| KI-67 (Texas Red)  | 150 - 185  | 20 - 65           | 60 - 170     |
