# Supplementary material for: Semantic Focusing Allows Fully Automated Single-Layer Slide Scanning of Cervical Cytology Slides
Source: PubMed Central journal article supplement (PMC3621829; doi:10.1371/journal.pone.0061441), 2013-04-09
Supplement: pone.0061441.s005.pdf [file pone.0061441.s005.pdf]

**Table S2. Detailed description of the five sharpness features used for the classification.**

| Name                          | Description                                                                                                                                                                                                                                                                                                                                                                                                                                                                                                                                                                                                                                                                                |
|-------------------------------|--------------------------------------------------------------------------------------------------------------------------------------------------------------------------------------------------------------------------------------------------------------------------------------------------------------------------------------------------------------------------------------------------------------------------------------------------------------------------------------------------------------------------------------------------------------------------------------------------------------------------------------------------------------------------------------------|
| Number of edges               | Edges of cell images are detected using a Sobel operator [24]. Number of edges is divided by number of pixels. The result is high for in-focus images containing lots of edges, and low for out-of-focus images.                                                                                                                                                                                                                                                                                                                                                                                                                                                                           |
| Gradient score                | The numerical gradients in $x$ and $y$ of the image are computed. They represent intensity changes, which are lower for blurred images compared to in-focus images. A score is calculated by building the sum of both gradient images intensities and dividing it by the number of pixels of the image.                                                                                                                                                                                                                                                                                                                                                                                    |
| Difference to sharpened image | An unsharp filter is applied to sharpen the images. The difference between result and original is computed. This works well on in-focus images, thus the difference is higher for in-focus images.                                                                                                                                                                                                                                                                                                                                                                                                                                                                                         |
| Difference to smoothed image  | Original images are smoothed with an average filter (disk with a 5 pixel radius) and the difference to original is computed. Average filter affects more the in-focus images, thus the difference is higher.                                                                                                                                                                                                                                                                                                                                                                                                                                                                               |
| Blur metric                   | The Blur metric [25] is computed by the intentional blurring of images. The blurring of in-focus images results in higher grayscale variation compared to lower variation in out-of-focus images. Briefly, the intensity variations between neighboring pixels of the input image are computed. A low-pass filter is then applied on the input image and the variations between the neighboring pixels are also computed on this image. A comparison between these intensity variations of both images allows evaluating the blur annoyance. A high variation between the images means that the original images were sharp whereas a low variation means that the input image was blurred. |
