# Supplementary material for: Semantic Focusing Allows Fully Automated Single-Layer Slide Scanning of Cervical Cytology Slides
Source: PubMed Central journal article supplement (PMC3621829; doi:10.1371/journal.pone.0061441), 2013-04-09
Supplement: pone.0061441.s006.pdf [file pone.0061441.s006.pdf]

## Pseudo-code for the whole control flow and the total focus quality analysis

```
1: function ControlFlow()
2:   if new slide is loaded then
3:     detect ROI, initialize scan data (slide_file_path, scan magnification etc.)
4:     set Focuspoints → start focusing → focuspoint_analysis(focuspoint images)
5:     if number of valid focuspoints > 5 then
6:       start scanning
7:     else
8:       set more focuspoints
9:       refocus new focuspoints
10:      goto line 5
11:    end if
12:    if scan successful then
13:      f_nf_determineSlideFocusQuality(slide_file_path)
14:      if slide quality is high enough then
15:        done → load next slide
16:      else if slide total unsharp then
17:        add more focus points
18:        start focusing → focuspoint_analysis(focuspoint images)
19:        go to line 5
20:      else if slide partially out of focus then
21:        add focus points in out of focus regions
22:        start focusing → focuspoint_analysis(focuspoint images)
23:        go to line 5
24:      end if
25:    end if
26:  end if
27: end function
```

```
1: function f_nf_determineSlideFocusQuality(slide_file_path s)
2:   li_overview_img = extract_image_from_slide(s, low_mag)
3:   lo_coordinates = calc_image_statistic_and_divide_into_16_tiles(overview)
4:   for each image tile do
5:     li_overview_img = extract_image_from_slide(s, low_mag, coordinates)
6:     find cell coordinates of 200 cells in tile
7:     for every found cell do
8:       extract cell image
9:       extract sharpness features
10:      determine sharpness of cell
11:    end for
12:    calculate sharpness score for tile
13:  end for
14:  calculate slides sharpness score
15: end function
```
